# Supplementary material
Source: PubMed Central journal article supplement (PMC3965904)
Supplement: supp_113.054304_Supplementary_Data_final_54304.pdf [file supp_113.054304_Supplementary_Data_final_54304.pdf]

DMD #54304

**Risk Factors for Development of Cholestatic Drug-induced Liver Injury:  
Inhibition of Hepatic Basolateral Bile Acid Transporters MRP3 and  
MRP4**

Kathleen Köck, Brian C. Ferslew, Ida Netterberg, Kyunghye Yang, Thomas J. Urban, Peter  
W. Swaan, Paul W. Stewart, and Kim L. R. Brouwer

**Drug Metabolism and Disposition**

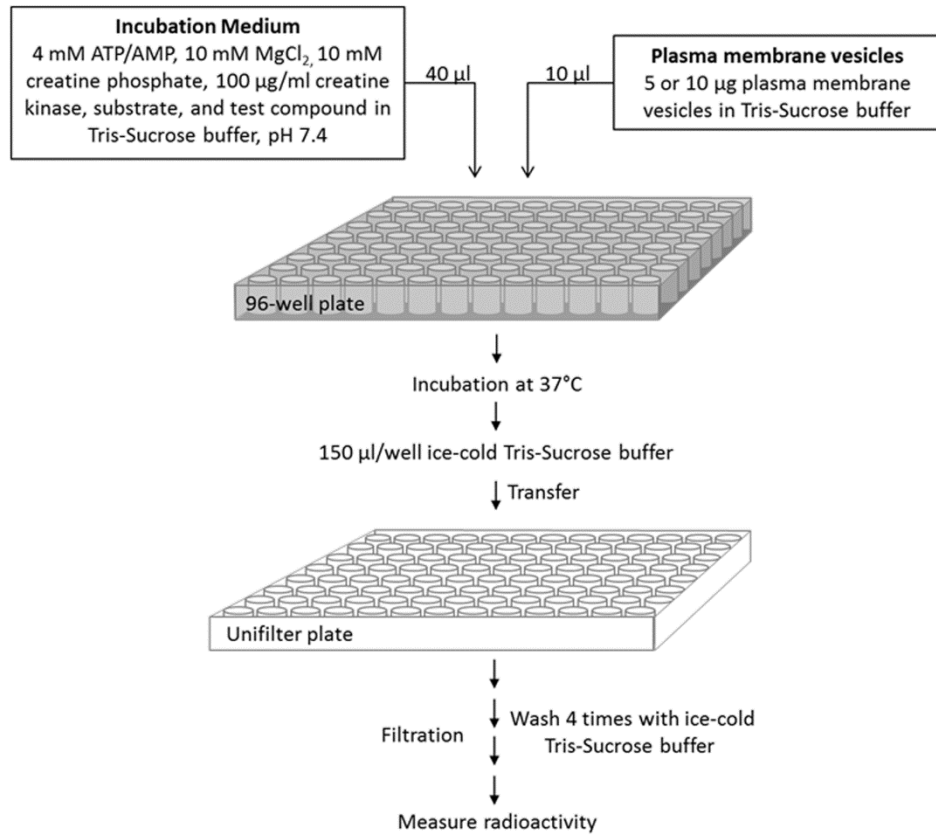

**Supplemental Figure 1.** Schematic of the high-throughput assay to study MRP3 and MRP4 inhibition.

**Supplementary Table 1. Human protein binding,  $C_{max}$ , unbound  $C_{max}$  ( $C_{max,u}$ ), maximum daily dose (MDD) in man, main route of excretion, extent of liver metabolism and involvement of phase II metabolism for the 88 investigated non-cholestatic and cholestatic compounds.**

| <b>Drug</b>                                | <b>Protein binding (%)</b> | <b><math>C_{max}</math> (<math>\mu\text{g}/\text{ml}</math>)</b> | <b><math>C_{max,u}</math> (<math>\mu\text{M}</math>)<sup>a</sup></b> | <b>MDD in man (<math>\text{mg}/\text{day}</math>)<sup>b</sup></b> | <b>Standard dose (<math>\text{mg}/\text{day}</math>)<sup>c</sup></b> | <b>Main Route of Excretion<sup>d</sup></b> | <b>Liver Metabolism<sup>e</sup></b> | <b>Phase II Metabolism</b> |
|--------------------------------------------|----------------------------|------------------------------------------------------------------|----------------------------------------------------------------------|-------------------------------------------------------------------|----------------------------------------------------------------------|--------------------------------------------|-------------------------------------|----------------------------|
| <b>Non-cholestatic BSEP non-inhibitors</b> |                            |                                                                  |                                                                      |                                                                   |                                                                      |                                            |                                     |                            |
| 5-Fluorouracil                             | 8.0 <sup>2</sup>           | 17.7 <sup>1</sup>                                                | 125                                                                  | 4420 iv <sup>1</sup>                                              | 2380                                                                 | Urinary <sup>19</sup>                      | Extensive <sup>20</sup>             | No                         |
| Alprenolol                                 | 80.0 <sup>2</sup>          | 0.14 <sup>3</sup>                                                | 0.11                                                                 | 800 <sup>1</sup>                                                  | 300                                                                  | Urinary                                    | Extensive                           | No                         |
| Antipyrine                                 | 10.0                       | 25 <sup>3</sup>                                                  | 120                                                                  | 800                                                               | 800                                                                  | N/A                                        | N/A                                 | N/A                        |
| Aspirin                                    | 80.0 <sup>1</sup>          | 200 <sup>3</sup>                                                 | 222                                                                  | 4000 <sup>1</sup>                                                 | 2037.5                                                               | Urinary                                    | Extensive                           | No                         |
| Caffeine                                   | 36.0 <sup>1</sup>          | 17.3 <sup>1</sup>                                                | 57                                                                   | 1200 <sup>1</sup>                                                 | 632.5                                                                | Urinary                                    | Extensive                           | No                         |
| Chlorpheniramine                           | 70.0 <sup>2</sup>          | 0.08 <sup>2</sup>                                                | 0.083                                                                | 24 <sup>1</sup>                                                   | 24                                                                   | Urinary                                    | Extensive                           | No                         |
| Clopamide                                  | 46.0 <sup>1</sup>          | 0.18 <sup>21</sup>                                               | 0.27                                                                 | 40 <sup>1</sup>                                                   | 22.5                                                                 | Urinary                                    | N/A                                 | No                         |
| Dexamethasone                              | 77.0 <sup>18</sup>         | 0.10 <sup>22</sup>                                               | 0.075                                                                | 24 <sup>1</sup>                                                   | 4.88                                                                 | Urinary                                    | Extensive <sup>23</sup>             | Yes <sup>24</sup>          |
| Diphenhydramine                            | 76.0 <sup>1</sup>          | 0.23                                                             | 0.22                                                                 | 300 <sup>1</sup>                                                  | 200                                                                  | Urinary                                    | Extensive                           | Yes                        |
| Doxorubicin                                | 74.0 <sup>1</sup>          | 0.95                                                             | 0.45                                                                 | 75/ m <sup>2</sup> /3 week iv <sup>1</sup>                        | 81                                                                   | Biliary                                    | Extensive                           | No                         |

DMD #54304

|                |                    |                     |         |                                           |       |                       |                 |     |
|----------------|--------------------|---------------------|---------|-------------------------------------------|-------|-----------------------|-----------------|-----|
| Etoposide      | 96.0 <sup>2</sup>  | 4.7                 | 0.32    | 2 g/m <sup>2</sup> / 24 h iv <sup>1</sup> | 85    | Urinary               | Extensive       | No  |
| Fluorescein    | 85.0 <sup>1</sup>  | 35 <sup>1</sup>     | 15.8    | 500 iv <sup>1</sup>                       | 500   | Urinary               | Extensive       | Yes |
| Metoclopramide | 30.0 <sup>1</sup>  | 0.1 <sup>1</sup>    | 0.23    | 60 <sup>6</sup>                           | 370   | Urinary               | Non-significant | Yes |
| Nadolol        | 28.0 <sup>1</sup>  | 0.25 <sup>3</sup>   | 0.58    | 320 <sup>1</sup>                          | 45    | Urinary               | Non-significant | No  |
| Naloxone       | 45.9 <sup>25</sup> | 0.03 <sup>3</sup>   | 0.050   | 3 <sup>1</sup>                            | 1.2   | Urinary               | Extensive       | Yes |
| Phenformin     | 12.0 <sup>1</sup>  | 0.15 <sup>1</sup>   | 0.65    | 2550 <sup>1</sup>                         | 81.25 | Urinary               | Non-significant | No  |
| Probenecid     | 80.0 <sup>1</sup>  | 150 <sup>3</sup>    | 100     | 2000 <sup>1</sup>                         | 1125  | Urinary               | Extensive       | Yes |
| Quinidine      | 80.0 <sup>1</sup>  | 8 <sup>1</sup>      | 4.9     | 1600 <sup>6</sup>                         | 1200  | Urinary               | Extensive       | No  |
| Tacrine        | 55.0 <sup>1</sup>  | 0.016 <sup>5</sup>  | 0.036   | 160 <sup>1</sup>                          | 40    | Urinary <sup>26</sup> | Extensive       | No  |
| Terbutaline    | 20 <sup>27</sup>   | 0.03 <sup>3</sup>   | 0.11    | 15 <sup>1</sup>                           | 11.25 | Urinary               | Non-significant | Yes |
| Theophylline   | 40.0 <sup>1</sup>  | 15 <sup>1</sup>     | 50      | 900 <sup>1</sup>                          | 450   | Urinary               | Extensive       | No  |
| Timolol        | 10.0 <sup>1</sup>  | 0.05 <sup>3</sup>   | 0.14    | 60 <sup>1</sup>                           | 35    | Urinary               | Extensive       | No  |
| Triamterene    | 55.0 <sup>1</sup>  | 0.1 <sup>3</sup>    | 0.18    | 300 <sup>1</sup>                          | 75    | Urinary               | Extensive       | Yes |
| Vinblastine    | 98.0 <sup>1</sup>  | 0.001 <sup>28</sup> | 0.00002 | 11.1/m <sup>2</sup> iv <sup>1</sup>       | 12.6  | Biliary               | Extensive       | No  |

**Cholestatic BSEP non-inhibitors**

|               |                   |                   |     |                   |      |         |           |     |
|---------------|-------------------|-------------------|-----|-------------------|------|---------|-----------|-----|
| Bezafibrate   | 95.0 <sup>1</sup> | 14.3 <sup>1</sup> | 2.0 | 600 <sup>1</sup>  | 500  | Urinary | N/A       | Yes |
| Carbamazepine | 74.0 <sup>2</sup> | 12 <sup>3</sup>   | 13  | 1600 <sup>1</sup> | 1000 | Urinary | Extensive | No  |

## DMD #54304

|                 |                   |                    |       |                   |       |                |                 |     |
|-----------------|-------------------|--------------------|-------|-------------------|-------|----------------|-----------------|-----|
| Chloramphenicol | 50.0 <sup>1</sup> | 25 <sup>3</sup>    | 39    | 7000 <sup>1</sup> | 5250  | Urinary        | Extensive       | No  |
| Chlorpromazine  | 90.0 <sup>1</sup> | 0.3 <sup>1</sup>   | 0.094 | 2000 <sup>1</sup> | 400   | Urinary (P.I.) | Extensive       | No  |
| Chlorpropamide  | 60.0 <sup>1</sup> | 150 <sup>3</sup>   | 217   | 750 <sup>1</sup>  | 300   | Urinary        | Extensive       | No  |
| Cimetidine      | 13.0 <sup>1</sup> | 3.9 <sup>1</sup>   | 13    | 1600 <sup>1</sup> | 800   | Urinary        | Extensive       | Yes |
| Desipramine     | 73.0 <sup>1</sup> | 0.5 <sup>3</sup>   | 0.45  | 300 <sup>1</sup>  | 150   | Urinary        | Extensive       | Yes |
| D-Penicillamine | 80.0 <sup>6</sup> | 5.6 <sup>3</sup>   | 7.5   | 4000 <sup>1</sup> | 187.5 | Urinary (P.I.) | Extensive       | No  |
| Famotidine      | 10.0 <sup>1</sup> | 104 <sup>1</sup>   | 277   | 640 <sup>1</sup>  | 360   | Urinary        | Non-significant | Yes |
| Fluoxetine      | 94.0 <sup>2</sup> | 0.477 <sup>1</sup> | 0.09  | 80 <sup>1</sup>   | 50    | Urinary        | Extensive       | No  |
| Furosemide      | 91.0 <sup>1</sup> | 6 <sup>3</sup>     | 1.6   | 600 <sup>1</sup>  | 90    | Urinary        | Non-significant | No  |
| Haloperidol     | 90.0 <sup>1</sup> | 0.02 <sup>2</sup>  | 0.006 | 15 <sup>1</sup>   | 1.25  | Urinary        | N/A             | Yes |
| Ibuprofen       | 99.0 <sup>2</sup> | 57 <sup>1</sup>    | 2.8   | 3200 <sup>1</sup> | 1000  | Urinary        | Extensive       | Yes |
| Maprotiline     | 88.0 <sup>1</sup> | 0.25 <sup>3</sup>  | 0.11  | 225 <sup>1</sup>  | 112.5 | Urinary        | N/A             | No  |
| Metformin       | 0.0 <sup>2</sup>  | 1 <sup>3</sup>     | 8     | 2550 <sup>1</sup> | 1250  | Urinary        | Non-significant | No  |
| Nitrofurantoin  | 62.0 <sup>2</sup> | 5 <sup>3</sup>     | 8.0   | 400 <sup>1</sup>  | 300   | Urinary (P.I.) | N/A             | No  |
| Nortriptyline   | 86.0 <sup>1</sup> | 0.2 <sup>3</sup>   | 0.11  | 100 <sup>1</sup>  | 87.5  | Urinary        | Extensive       | No  |
| Promethazine    | 93.0 <sup>1</sup> | 0.4 <sup>3</sup>   | 0.10  | 150 <sup>1</sup>  | 37.5  | Urinary        | Extensive       | No  |
| Quinine         | 69.0 <sup>1</sup> | 10 <sup>2</sup>    | 10    | 2600 <sup>1</sup> | 1800  | Urinary        | Extensive       | Yes |

DMD #54304

|               |                   |                   |       |                   |      |         |                 |     |
|---------------|-------------------|-------------------|-------|-------------------|------|---------|-----------------|-----|
| Ranitidine    | 15.0 <sup>2</sup> | 1 <sup>3</sup>    | 2.7   | 300 <sup>1</sup>  | 150  | Urinary | Extensive       | No  |
| Sulfasalazine | 99.3 <sup>1</sup> | 30 <sup>3</sup>   | 0.53  | 4000 <sup>1</sup> | 2000 | Urinary | N/A             | No  |
| Sulindac      | 93.0 <sup>1</sup> | 6 <sup>3</sup>    | 1.2   | 400 <sup>1</sup>  | 350  | Urinary | Extensive       | Yes |
| Tamoxifen     | 98.0 <sup>2</sup> | 0.12 <sup>2</sup> | 0.006 | 40 <sup>1</sup>   | 30   | Biliary | Extensive       | No  |
| Tolbutamide   | 80.0 <sup>1</sup> | 100 <sup>3</sup>  | 74    | 3000 <sup>1</sup> | 1125 | Urinary | Extensive       | No  |
| Trimethoprim  | 37.0 <sup>2</sup> | 2.5 <sup>2</sup>  | 5.4   | 1050 <sup>1</sup> | 150  | Urinary | Non-significant | No  |
| Verapamil     | 90.0 <sup>2</sup> | 0.27 <sup>2</sup> | 0.06  | 480 <sup>1</sup>  | 280  | Urinary | Extensive       | No  |

**Non-cholestatic BSEP-inhibitors**

|                       |                    |                    |       |                                |     |                       |                         |                   |
|-----------------------|--------------------|--------------------|-------|--------------------------------|-----|-----------------------|-------------------------|-------------------|
| Alpidem               | 99.1 <sup>4</sup>  | 0.27 <sup>4</sup>  | 0.006 | 150                            | 150 | Biliary <sup>8</sup>  | Extensive <sup>8</sup>  | Yes               |
| Benzbromarone         | 99.0 <sup>9</sup>  | 3.35 <sup>10</sup> | 0.079 | 200 <sup>1</sup>               | 125 | Biliary <sup>11</sup> | Extensive               | Yes               |
| Buspirone             | 86.0 <sup>1</sup>  | 0.004              | 0.002 | 90 <sup>1</sup>                | 25  | Urinary               | Extensive               | No                |
| Clobetasol propionate | 97.5 <sup>4</sup>  | 0.02 <sup>4</sup>  | 0.001 | 50 g/week topical <sup>1</sup> |     | Urinary               | N/A                     | N/A               |
| Finasteride           | 90.0 <sup>2</sup>  | 0.37 <sup>2</sup>  | 0.099 | 5 <sup>1</sup>                 | 3   | Biliary <sup>12</sup> | Extensive               | No                |
| Flupirtine            | 80.0 <sup>13</sup> | 1.5 <sup>3</sup>   | 0.99  | 600 <sup>1</sup>               | 450 | Urinary <sup>14</sup> | N/A                     | Yes <sup>15</sup> |
| Glafenine             | 96.7 <sup>4</sup>  | 0.7 <sup>5</sup>   | 0.062 | 1200 <sup>4</sup>              | 800 | Urinary <sup>16</sup> | Extensive <sup>16</sup> | Yes <sup>17</sup> |
| Lopinavir             | 98.0 <sup>6</sup>  | 11.8 <sup>1</sup>  | 0.38  | 800 <sup>6</sup>               | 800 | Biliary               | Extensive               | No                |
| Mibefradil            | 99.5 <sup>1</sup>  | 0.3 <sup>1</sup>   | 0.003 | 100 <sup>1</sup>               | 50  | Biliary               | Extensive               | No                |

DMD #54304

|              |                    |                    |         |                                            |      |                       |           |     |
|--------------|--------------------|--------------------|---------|--------------------------------------------|------|-----------------------|-----------|-----|
| Oxybutynin   | 99.0 <sup>1</sup>  | 0.001 <sup>1</sup> | 0.00028 | 30 <sup>1</sup>                            | 7.5  | Biliary <sup>11</sup> | Extensive | No  |
| Praziquantel | 80.0 <sup>2</sup>  | 2.2 <sup>1</sup>   | 1.4     | 5250 <sup>1</sup>                          | 5250 | Urinary               | Extensive | No  |
| Primaquine   | 77.0 <sup>18</sup> | 0.2 <sup>3</sup>   | 0.18    | 30 <sup>1</sup>                            | 30   | Biliary <sup>11</sup> | Extensive | N/A |
| Sorafenib    | 99.5 <sup>1</sup>  | 9.9 <sup>1</sup>   | 0.106   | 800 <sup>1</sup>                           | 800  | Biliary               | Extensive | Yes |
| Taxol        | 88.0 <sup>2</sup>  | 1 <sup>3</sup>     | 0.14    | 250/m <sup>2</sup> /3 week iv <sup>6</sup> | 217  | Biliary               | Extensive | No  |
| Tolcapone    | 99.9 <sup>2</sup>  | 13 <sup>3</sup>    | 0.048   | 1200 <sup>1</sup>                          | 450  | Urinary               | Extensive | Yes |
| Valinomycin  | N/A                | N/A                |         | N/A                                        | N/A  | N/A                   | N/A       | N/A |

**Cholestatic BSEP-inhibitors**

|                       |                   |                    |       |                   |      |                 |                 |     |
|-----------------------|-------------------|--------------------|-------|-------------------|------|-----------------|-----------------|-----|
| Acitretin             | 99.0 <sup>1</sup> | 0.42 <sup>1</sup>  | 0.013 | 75 <sup>1</sup>   | 37.5 | Urinary/biliary | Extensive       | Yes |
| Clozapine             | 95.0 <sup>2</sup> | 0.8 <sup>3</sup>   | 0.12  | 900 <sup>1</sup>  | 375  | Urinary         | Extensive       | No  |
| Cyclosporin A         | 90.0              | 0.4 <sup>3</sup>   | 0.03  | 700 <sup>1</sup>  | 525  | Biliary         | Extensive       | No  |
| Dicloxacillin         | 88.0 <sup>1</sup> | 91 <sup>2</sup>    | 23    | 2000 <sup>1</sup> | 1750 | Urinary         | Non-significant | No  |
| Erythromycin Estolate | 95.0 <sup>4</sup> | 3.08 <sup>5</sup>  | 0.15  | 1000 <sup>4</sup> | 1000 | Biliary         | Non-significant | No  |
| Fenofibrate           | 99.0 <sup>1</sup> | 30 <sup>1</sup>    | 0.83  | 160 <sup>1</sup>  | 100  | Urinary         | N/A             | Yes |
| Fluvastatin           | 98.0 <sup>1</sup> | 0.42 <sup>1</sup>  | 0.02  | 80 <sup>1</sup>   | 50   | Biliary         | Extensive       | Yes |
| Glyburide             | 99.0 <sup>1</sup> | 0.2 <sup>1</sup>   | 0.004 | 20 <sup>1</sup>   | 10.6 | Urinary/biliary | Extensive       | No  |
| Indinavir             | 60.0 <sup>1</sup> | 0.013 <sup>1</sup> | 0.008 | 2400 <sup>1</sup> | 2100 | Biliary         | Extensive       | Yes |

## DMD #54304

|                  |                   |                    |        |                   |      |                |           |     |
|------------------|-------------------|--------------------|--------|-------------------|------|----------------|-----------|-----|
| Indomethacin     | 90.0 <sup>2</sup> | 3 <sup>3</sup>     | 0.84   | 200 <sup>1</sup>  | 125  | Urinary        | Extensive | No  |
| Nifedipine       | 90.0 <sup>1</sup> | 0.1 <sup>3</sup>   | 0.029  | 180 <sup>6</sup>  | 45   | Urinary        | Extensive | No  |
| Nitrendipine     | 97.0 <sup>1</sup> | 0.05 <sup>3</sup>  | 0.004  | 40 <sup>1</sup>   | 25   | Urinary        | Extensive | Yes |
| 19-Norethindrone | 61.0 <sup>1</sup> | 0.01 <sup>5</sup>  | 0.013  | 5 <sup>6</sup>    | 2.7  | Urinary        | Extensive | Yes |
| Omeprazole       | 95.0 <sup>2</sup> | 4 <sup>3</sup>     | 0.58   | 360 <sup>1</sup>  | 30   | Urinary        | Extensive | No  |
| Pioglitazone     | 99.0 <sup>1</sup> | 1.5 <sup>2</sup>   | 0.042  | 45 <sup>1</sup>   | 22.5 | Biliary (P.I.) | Extensive | No  |
| Rifampicin       | 60.0 <sup>1</sup> | 10 <sup>3</sup>    | 4.9    | 600 <sup>1</sup>  | 450  | Biliary        | Extensive | No  |
| Rifamycin SV     | 80.0 <sup>4</sup> | 11 <sup>4</sup>    | 3.2    | 600 <sup>4</sup>  | 450  | Biliary        | Extensive | No  |
| Ritonavir        | 98.0 <sup>1</sup> | 11.2 <sup>1</sup>  | 0.31   | 1200 <sup>1</sup> | 600  | Biliary        | Extensive | No  |
| Rosiglitazone    | 99.8 <sup>1</sup> | 0.275 <sup>2</sup> | 0.0015 | 8 <sup>1</sup>    | 4    | Urinary        | Extensive | Yes |
| Simvastatin      | 94.0 <sup>2</sup> | 0.06 <sup>7</sup>  | 0.008  | 80 <sup>1</sup>   | 22.5 | Biliary        | Extensive | No  |
| Ticlopidine      | 98.0 <sup>2</sup> | 2.1 <sup>5</sup>   | 0.14   | 500 <sup>1</sup>  | 500  | Urinary        | Extensive | No  |
| Troglitazone     | 99.0 <sup>1</sup> | 2.8 <sup>5</sup>   | 0.064  | 600 <sup>1</sup>  | 400  | Biliary        | Extensive | Yes |

<sup>a</sup> Calculated from C<sub>max</sub> and protein binding

<sup>b</sup> Administered orally if not stated otherwise.

<sup>c</sup> If a dose range was recommended (e.g. for different indications), the average of minimum and maximum recommended daily dose was calculated. If dosing was given as mg/kg or mg/m<sup>2</sup>, the maximum and average dose was calculated based on an adult with 70 kg and a body surface area of 1.7.

<sup>d</sup> Compounds were categorized as urinary vs. biliary if >50% of the reported elimination occurred by a given pathway.



<sup>e</sup> Compounds with  $\geq 50\%$  of hepatic metabolism were categorized as “extensive”; compounds  $< 50\%$  were categorized into the “non-significant” group.

N/A, Not Available, P.I., packaging insert

- <sup>1</sup> Micromedex®. Version 2.0 (accessed January 2012). In. Greenwood Village, Colo: Thomson Reuters (Healthcare).
- <sup>2</sup> Hardman JG, Limbird LE. Goodman and Gilman's the pharmacological basis of therapeutics. , 2001.
- <sup>3</sup> Regenthal R, Krueger M, Koeppel C, Preiss R. Drug levels: therapeutic and toxic serum/plasma concentrations of common drugs. *J Clin Monit Comput* 1999;15:529-544.
- <sup>4</sup> Dawson S, Stahl S, Paul N, Barber J, Kenna JG. In vitro inhibition of the bile salt export pump correlates with risk of cholestatic drug-induced liver injury in humans. *Drug Metab Dispos* 2012;40:130-138.
- <sup>5</sup> Xu JJ, Henstock PV, Dunn MC, Smith AR, Chabot JR, de Graaf D. Cellular imaging predictions of clinical drug-induced liver injury. *Toxicol Sci* 2008;105:97-105.
- <sup>6</sup> Lexi-Comp. <http://www.lexi.com/> (accessed January 2012). In. Hudson, Ohio: Lexi-Comp Inc.
- <sup>7</sup> Kyrklund C, Backman JT, Kivisto KT, Neuvonen M, Laitila J, Neuvonen PJ. Rifampin greatly reduces plasma simvastatin and simvastatin acid concentrations. *Clin Pharmacol Ther* 2000;68:592-597.
- <sup>8</sup> Durand A, Thenot JP, Bianchetti G, Morselli PL. Comparative pharmacokinetic profile of two imidazopyridine drugs: zolpidem and alpidem. *Drug Metab Rev* 1992;24:239-266.
- <sup>9</sup> Lee MH, Graham GG, Williams KM, Day RO. A benefit-risk assessment of benzbromarone in the treatment of gout. Was its withdrawal from the market in the best interest of patients? *Drug Saf* 2008;31:643-665.
- <sup>10</sup> de Vries JX, Walter-Sack I, Ittensohn A, Weber E, Empl H, Gresser U, Zollner N. Benzbromarone hydroxylation in man: defective formation of the 6-hydroxybenzbromarone metabolite. *Clin Investig* 1993;71:947-952.

- 11 Morgan RE, Trauner M, van Staden CJ, Lee PH, Ramachandran B, Eschenberg M, Afshari CA, et al. Interference with bile salt export pump function is a susceptibility factor for human liver injury in drug development. *Toxicol Sci* 2010;118:485-500.
- 12 Lundahl A, Hedeland M, Bondesson U, Knutson L, Lennernas H. The effect of St. John's wort on the pharmacokinetics, metabolism and biliary excretion of finasteride and its metabolites in healthy men. *Eur J Pharm Sci* 2009;36:433-443.
- 13 Devulder J. Flupirtine in pain management: pharmacological properties and clinical use. *CNS Drugs* 2010;24:867-881.
- 14 Hlavica P, Niebch G. [Pharmacokinetics and biotransformation of the analgesic flupirtine in humans]. *Arzneimittelforschung* 1985;35:67-74.
- 15 Methling K, Reszka P, Lalk M, Vrana O, Scheuch E, Siegmund W, Terhaag B, et al. Investigation of the in vitro metabolism of the analgesic flupirtine. *Drug Metab Dispos* 2009;37:479-493.
- 16 Pottier J, Busigny M, Raynaud JP. Biotransformations of glafenine in the rat and in man. *Eur J Drug Metab Pharmacokinet* 1979;4:109-115.
- 17 Wen B, Moore DJ. Bioactivation of glafenine by human liver microsomes and peroxidases: identification of electrophilic iminoquinone species and GSH conjugates. *Drug Metab Dispos* 2011;39:1511-1521.
- 18 Peets EA, Staub M, Symchowicz S. Plasma binding of betamethasone-3H, dexamethasone-3H, and cortisol-14C--a comparative study. *Biochem Pharmacol* 1969;18:1655-1663.
- 19 Heggie GD, Sommadossi JP, Cross DS, Huster WJ, Diasio RB. Clinical pharmacokinetics of 5-fluorouracil and its metabolites in plasma, urine, and bile. *Cancer Res* 1987;47:2203-2206.
- 20 Diasio RB, Harris BE. Clinical pharmacology of 5-fluorouracil. *Clin Pharmacokinet* 1989;16:215-237.
- 21 McNeil JJ, Conway EL, Drummer OH, Howes LG, Christophidis N, Louis WJ. Clopamide: plasma concentrations and diuretic effect in humans. *Clin Pharmacol Ther* 1987;42:299-304.
- 22 Harahap Y, Sasongko L, Prasaja B, Indriati E, Lusthom W, Lipin. Comparative bioavailability of two dexamethasone tablet formulations in Indonesian healthy volunteers. *Arzneimittelforschung* 2009;59:191-194.
- 23 Seutter E. Metabolism of systematically given corticosteroids. *Dermatologica* 1975;151:129-134.

- <sup>24</sup> Antignac JP, Le Bizec B, Monteau F, Andre F. Study of natural and artificial corticosteroid phase II metabolites in bovine urine using HPLC-MS/MS. *Steroids* 2002;67:873-882.
- <sup>25</sup> Asali LA, Brown KF. Naloxone protein binding in adult and foetal plasma. *Eur J Clin Pharmacol* 1984;27:459-463.
- <sup>26</sup> Madden S, Spaldin V, Park BK. Clinical pharmacokinetics of tacrine. *Clin Pharmacokinet* 1995;28:449-457.
- <sup>27</sup> Lombardo F, Obach RS, Shalaeva MY, Gao F. Prediction of volume of distribution values in humans for neutral and basic drugs using physicochemical measurements and plasma protein binding data. *J Med Chem* 2002;45:2867-2876.
- <sup>28</sup> Ramirez J, Ogan K, Ratain MJ. Determination of vinca alkaloids in human plasma by liquid chromatography/atmospheric pressure chemical ionization mass spectrometry. *Cancer Chemother Pharmacol* 1997;39:286-290.

**Supplemental Table 2. Relationship between the type of liver injury and the extent of metabolism.** Compounds with  $\geq 50\%$  hepatic metabolism were categorized as extensive, whereas compounds with  $< 50\%$  hepatic metabolism or no hepatic metabolism were categorized as not extensive. Compounds with no information on the extent of hepatic metabolism (n=11) were excluded from the analysis. Odds ratio estimates are shown with their 95% CIs.

| <b>All compounds (n=77)</b>       |             |                 |                   |
|-----------------------------------|-------------|-----------------|-------------------|
|                                   | Cholestatic | Non-cholestatic | Odds Ratio        |
| Extensive                         | 36          | 31              | 0.77 [0.15, 3.62] |
| Not extensive                     | 6           | 4               |                   |
| <b>BSEP non-inhibitors (n=43)</b> |             |                 |                   |
|                                   | Cholestatic | Non-cholestatic | Odds Ratio        |
| Extensive                         | 17          | 18              | 0.94 [0.15, 5.96] |
| Not extensive                     | 4           | 4               |                   |
| <b>BSEP inhibitors (n=34)</b>     |             |                 |                   |
|                                   | Cholestatic | Non-cholestatic | Odds Ratio        |
| Extensive                         | 19          | 13              | 0.00 [0.00, 5.61] |
| Not extensive                     | 2           | 0               |                   |

**Supplementary Table 3. Relationship between the type of liver injury and the primary route of excretion.** Compounds were categorized as urinary or biliary if >50% of the reported elimination occurred by a given pathway. Four compounds were excluded because the route of excretion was not available, or the same extent of biliary and urinary excretion was reported. Odds ratios with 95% confidence intervals are shown.

| <b>All compounds (n=84)</b>       |             |                 |                   |
|-----------------------------------|-------------|-----------------|-------------------|
|                                   | Cholestatic | Non cholestatic | Odds Ratio        |
| Biliary excretion                 | 11          | 11              | 0.74 [0.25, 2.22] |
| Urinary excretion                 | 35          | 26              |                   |
| <b>BSEP non-inhibitors (n=49)</b> |             |                 |                   |
|                                   | Cholestatic | Non cholestatic | Odds Ratio        |
| Biliary excretion                 | 1           | 2               | 0.42 [0.01, 8.75] |
| Urinary excretion                 | 25          | 21              |                   |
| <b>BSEP inhibitors (n=35)</b>     |             |                 |                   |
|                                   | Cholestatic | Non cholestatic | Odds Ratio        |
| Biliary excretion                 | 10          | 9               | 0.67 [0.14, 3.13] |
| Urinary excretion                 | 10          | 6               |                   |

**Supplementary Table 4. Association between maximal unbound concentration  $C_{\max,u}$ , maximal daily dose (MDD), average daily dose (Avg. dose), MRP4 and BSEP inhibition for non-cholestatic and cholestatic drugs.** Valinomycin was excluded from the analysis due to missing information on  $C_{\max}$  and dose. Data are presented as median values.

| <b>TYPE OF LIVER INJURY</b>                |                                   |                 |                       |
|--------------------------------------------|-----------------------------------|-----------------|-----------------------|
| <b>All compounds (n=87)</b>                |                                   |                 |                       |
|                                            | $C_{\max,u}$<br>( $\mu\text{M}$ ) | MDD<br>(mg/day) | Avg. dose<br>(mg/day) |
| Non-cholestatic (n = 39)                   | 0.27                              | 310             | 132.5                 |
| Cholestatic (n = 48)                       | 2.05                              | 490             | 300                   |
| <b>BSEP INHIBITION</b>                     |                                   |                 |                       |
| <b>All compounds (n=87)</b>                |                                   |                 |                       |
|                                            | $C_{\max,u}$<br>( $\mu\text{M}$ ) | MDD<br>(mg/day) | Avg. dose<br>(mg/day) |
| Non-cholestatic BSEP non-inhibitors (n=24) | 0.30                              | 310             | 85                    |
| Cholestatic BSEP non-inhibitors (n=26)     | 2.34                              | 620             | 300                   |
| Non-cholestatic BSEP inhibitors (n=15)     | 0.08                              | 312.5           | 217                   |
| Cholestatic BSEP inhibitors (n=22)         | 0.05                              | 280             | 250                   |
| <b>MRP4 INHIBITION</b>                     |                                   |                 |                       |
| <b>All compounds (n= 87)</b>               |                                   |                 |                       |
|                                            | $C_{\max,u}$<br>( $\mu\text{M}$ ) | MDD<br>(mg/day) | Avg. dose<br>(mg/day) |
| Non-cholestatic MRP4 non-inhibitors (n=31) | 0.25                              | 240             | 81                    |
| Cholestatic MRP4 non-inhibitors (n=11)     | 13.2                              | 1600            | 800                   |
| Non-cholestatic MRP4 inhibitors (n=8)      | 0.10                              | 550             | 200                   |
| Cholestatic MRP4 inhibitors (n=37)         | 0.11                              | 360             | 215                   |
| <b>BSEP non-inhibitors (n=50)</b>          |                                   |                 |                       |
|                                            | $C_{\max,u}$<br>( $\mu\text{M}$ ) | MDD<br>(mg/day) | Avg. dose<br>(mg/day) |
| Non-cholestatic MRP4 non-inhibitors (n=20) | 0.27                              | 160             | 81                    |
| Cholestatic MRP4 non-inhibitors (n=10)     | 13.3                              | 1600            | 580                   |
| Non-cholestatic MRP4 inhibitors (n=4)      | 0.27                              | 950             | 143                   |
| Cholestatic MRP4 inhibitors (n=16)         | 0.28                              | 400             | 280                   |
| <b>BSEP inhibitors (n=37)</b>              |                                   |                 |                       |
|                                            | $C_{\max,u}$<br>( $\mu\text{M}$ ) | MDD<br>(mg/day) | Avg. dose<br>(mg/day) |
| Non-cholestatic MRP4 non-inhibitors (n=11) | 0.05                              | 200             | 288                   |
| Cholestatic MRP4 non-inhibitors (n=1)      | 0.01                              | 2400            | 2100                  |
| Non-cholestatic MRP4 inhibitors (n=4)      | 0.16                              | 257.5           | 123                   |
| Cholestatic MRP4 inhibitors (n=21)         | 0.06                              | 200             | 125                   |

If dosing was given as mg/kg or mg/m<sup>2</sup>, the maximum and average dose was calculated based on an adult with 70 kg and a body surface area of 1.7.
